# Supplementary material for: Environmental determinants and potential suitability for Phlebotomus mascittii sand flies in central-western Europe under future Shared Socioeconomic Pathways climate change projections
Source: Research Square preprint supplement (doi:10.21203/rs.3.rs-8718479/v1), 2026-02-16
Supplement: Supplementary file 1 [file 30d62cea3fc882871fcd7f79.docx]

Table S1. Current and predicted increased probability of sand fly presence for year periods 2041–2060 and 2081–2100, under three SPP scenarios in NUTS 2 geographical subdivisions in the study area. Values are expressed as a percentage.

| ID | Country* | NUTS 2* | Current | SSP 2 (4.5) | | SSP 3 (7.0) | | SSP 5 (8.5) | |
| --- | --- | --- | --- | --- | --- | --- | --- | --- | --- |
|  |  |  |  | 2041-2060 | 2081-2100 | 2041-2060 | 2081-2100 | 2041-2060 | 2081-2100 | |
| 1 | AT | AT34 | 0.09 | 0.84 | 1.19 | 1.26 | 7.95 | 1.27 | 16.19 | |
| 2 | BE | BE10 | 4.32 | 23.95 | 34.75 | 27.48 | 65.57 | 32.71 | 83.23 | |
| 3 | BE | BE21 | 2.87 | 16.96 | 25.54 | 19.24 | 53.68 | 24.10 | 76.29 | |
| 4 | BE | BE22 | 2.24 | 14.17 | 21.98 | 17.03 | 51.13 | 21.00 | 75.36 | |
| 5 | BE | BE23 | 4.74 | 24.69 | 35.24 | 27.41 | 63.79 | 32.68 | 81.51 | |
| 6 | BE | BE24 | 4.10 | 23.06 | 33.86 | 26.57 | 64.68 | 31.69 | 82.83 | |
| 7 | BE | BE25 | 4.70 | 23.91 | 33.71 | 26.40 | 61.21 | 31.28 | 79.52 | |
| 8 | BE | BE31 | 3.44 | 20.73 | 31.11 | 24.32 | 63.06 | 28.76 | 82.52 | |
| 9 | BE | BE32 | 3.14 | 19.18 | 28.72 | 22.50 | 59.49 | 26.04 | 80.22 | |
| 10 | BE | BE33 | 1.09 | 8.06 | 13.28 | 10.16 | 37.96 | 12.28 | 64.06 | |
| 11 | BE | BE34 | 1.23 | 9.55 | 15.60 | 12.19 | 43.97 | 14.10 | 70.15 | |
| 12 | BE | BE35 | 1.80 | 12.91 | 20.55 | 15.95 | 51.80 | 18.72 | 76.57 | |
| 13 | CH | CH01 | 4.06 | 15.08 | 17.76 | 16.91 | 37.17 | 18.73 | 51.01 | |
| 14 | CH | CH02 | 1.29 | 10.37 | 14.82 | 12.41 | 41.94 | 14.01 | 62.79 | |
| 15 | CH | CH03 | 2.21 | 15.62 | 22.95 | 19.21 | 61.40 | 21.28 | 82.11 | |
| 16 | CH | CH04 | 1.44 | 11.40 | 14.68 | 15.70 | 57.40 | 17.21 | 78.38 | |
| 17 | CH | CH05 | 0.39 | 2.77 | 3.39 | 3.83 | 13.72 | 4.15 | 20.65 | |
| 18 | CH | CH06 | 0.23 | 2.42 | 3.49 | 3.27 | 18.59 | 3.30 | 32.73 | |
| 19 | CH | CH07 | 1.42 | 8.84 | 9.72 | 9.81 | 26.30 | 8.98 | 36.60 | |
| 20 | DE | DE11 | 2.70 | 18.47 | 28.68 | 23.18 | 64.55 | 26.42 | 83.77 | |
| 21 | DE | DE12 | 5.58 | 24.48 | 33.50 | 29.89 | 62.23 | 31.64 | 77.76 | |
| 22 | DE | DE13 | 3.24 | 16.32 | 21.89 | 19.78 | 47.82 | 21.15 | 65.51 | |
| 23 | DE | DE14 | 0.95 | 7.38 | 11.16 | 10.04 | 42.73 | 11.75 | 68.20 | |
| 24 | DE | DE26 | 2.40 | 16.10 | 25.31 | 19.55 | 58.00 | 24.02 | 80.79 | |
| 25 | DE | DE27 | 0.72 | 5.93 | 10.56 | 7.55 | 33.69 | 9.23 | 54.69 | |
| 26 | DE | DE50 | 1.55 | 7.94 | 12.92 | 8.85 | 29.84 | 12.17 | 55.98 | |
| 27 | DE | DE60 | 1.54 | 8.40 | 13.82 | 9.66 | 32.87 | 13.02 | 60.78 | |
| 28 | DE | DE71 | 5.47 | 25.67 | 35.74 | 30.73 | 66.10 | 34.38 | 82.75 | |
| 29 | DE | DE72 | 1.55 | 10.31 | 16.22 | 12.62 | 41.87 | 15.64 | 67.74 | |
| 30 | DE | DE73 | 0.78 | 5.53 | 9.24 | 6.89 | 28.91 | 9.10 | 56.81 | |
| 31 | DE | DE91 | 1.24 | 7.56 | 12.04 | 9.37 | 33.16 | 11.87 | 60.03 | |
| 32 | DE | DE92 | 1.26 | 7.43 | 12.00 | 8.94 | 32.33 | 11.74 | 60.68 | |
| 33 | DE | DE93 | 1.19 | 6.68 | 10.90 | 7.77 | 27.87 | 10.49 | 54.52 | |
| 34 | DE | DE94 | 0.90 | 5.10 | 8.48 | 5.65 | 21.53 | 8.05 | 45.70 | |
| 35 | DE | DEA1 | 2.53 | 14.72 | 22.57 | 17.33 | 50.16 | 21.65 | 74.18 | |
| 36 | DE | DEA2 | 1.77 | 11.21 | 17.49 | 13.64 | 42.67 | 16.65 | 65.95 | |
| 37 | DE | DEA3 | 0.81 | 5.24 | 8.63 | 6.21 | 25.25 | 8.30 | 52.64 | |
| 38 | DE | DEA4 | 0.82 | 5.18 | 8.61 | 6.35 | 25.89 | 8.43 | 53.39 | |
| 39 | DE | DEA5 | 0.28 | 2.03 | 3.49 | 2.52 | 12.54 | 3.37 | 31.80 | |
| 40 | DE | DEB1 | 2.00 | 12.79 | 19.81 | 15.97 | 48.48 | 18.68 | 72.47 | |
| 41 | DE | DEB2 | 1.95 | 13.01 | 20.18 | 16.97 | 48.66 | 18.78 | 71.60 | |
| 42 | DE | DEB3 | 8.79 | 34.78 | 46.11 | 41.14 | 73.84 | 44.02 | 84.70 | |
| 43 | DE | DEC0 | 2.88 | 19.49 | 30.02 | 25.37 | 64.52 | 27.18 | 83.50 | |
| 44 | DE | DEF0 | 0.76 | 4.46 | 7.63 | 5.12 | 19.81 | 7.10 | 43.54 | |
| 45 | FR | FR102 | 16.41 | 49.39 | 59.65 | 54.84 | 76.74 | 56.22 | 81.40 | |
| 46 | FR | FR104 | 25.97 | 51.85 | 59.27 | 55.84 | 70.15 | 56.98 | 72.84 | |
| 47 | FR | FR106 | 29.25 | 50.64 | 57.66 | 54.32 | 67.17 | 55.55 | 69.64 | |
| 48 | FR | FR107 | 37.81 | 47.75 | 53.00 | 50.54 | 59.80 | 51.42 | 61.45 | |
| 49 | FR | FR108 | 19.06 | 48.73 | 58.32 | 53.03 | 73.66 | 55.36 | 78.57 | |
| 50 | FR | FRB01 | 27.99 | 53.28 | 60.23 | 57.28 | 69.43 | 57.52 | 71.28 | |
| 51 | FR | FRB06 | 25.10 | 53.42 | 60.89 | 57.82 | 71.59 | 58.45 | 73.90 | |
| 52 | FR | FRC11 | 19.78 | 51.15 | 60.92 | 56.11 | 75.69 | 56.81 | 78.86 | |
| 53 | FR | FRC12 | 16.92 | 54.77 | 64.62 | 60.68 | 79.01 | 60.34 | 81.90 | |
| 54 | FR | FRC13 | 29.61 | 53.37 | 60.05 | 56.52 | 68.32 | 57.62 | 69.81 | |
| 55 | FR | FRC14 | 16.30 | 53.04 | 63.31 | 59.18 | 78.83 | 59.00 | 82.23 | |
| 56 | FR | FRC21 | 4.02 | 23.13 | 31.67 | 26.53 | 62.57 | 29.01 | 80.58 | |
| 57 | FR | FRC22 | 13.93 | 39.87 | 49.22 | 43.54 | 70.83 | 45.90 | 79.92 | |
| 58 | FR | FRC23 | 13.00 | 45.25 | 57.51 | 49.89 | 77.94 | 52.62 | 84.03 | |
| 59 | FR | FRC24 | 5.19 | 33.17 | 47.38 | 37.97 | 77.03 | 41.75 | 88.16 | |
| 60 | FR | FRE11 | 5.31 | 25.24 | 35.43 | 28.68 | 63.90 | 32.51 | 81.24 | |
| 61 | FR | FRE12 | 8.98 | 32.07 | 42.48 | 35.22 | 66.75 | 39.30 | 80.65 | |
| 62 | FR | FRE21 | 5.96 | 31.10 | 43.04 | 36.64 | 72.12 | 39.39 | 85.53 | |
| 63 | FR | FRE22 | 9.38 | 38.77 | 50.67 | 43.65 | 74.56 | 46.63 | 84.84 | |
| 64 | FR | FRE23 | 5.95 | 29.45 | 40.68 | 33.21 | 68.04 | 36.71 | 83.52 | |
| 65 | FR | FRF11 | 9.06 | 39.74 | 52.34 | 46.62 | 78.10 | 48.51 | 86.18 | |
| 66 | FR | FRF12 | 12.95 | 39.93 | 50.15 | 43.99 | 70.34 | 46.60 | 79.14 | |
| 67 | FR | FRF21 | 3.40 | 21.89 | 32.28 | 26.86 | 65.20 | 29.19 | 83.44 | |
| 68 | FR | FRF22 | 10.46 | 46.61 | 58.84 | 53.40 | 81.32 | 53.92 | 86.96 | |
| 69 | FR | FRF23 | 8.41 | 40.52 | 53.20 | 47.11 | 79.52 | 49.02 | 87.59 | |
| 70 | FR | FRF24 | 16.79 | 52.71 | 63.11 | 57.93 | 78.38 | 59.08 | 81.76 | |
| 71 | FR | FRF31 | 11.86 | 45.62 | 58.01 | 51.72 | 79.22 | 54.25 | 85.22 | |
| 72 | FR | FRF32 | 8.74 | 40.37 | 52.92 | 46.80 | 79.14 | 49.06 | 87.20 | |
| 73 | FR | FRF33 | 8.76 | 39.35 | 52.65 | 46.44 | 78.80 | 48.96 | 86.94 | |
| 74 | FR | FRF34 | 6.97 | 35.59 | 48.59 | 40.96 | 75.11 | 43.49 | 86.01 | |
| 75 | FR | FRI21 | 31.18 | 48.82 | 56.17 | 51.81 | 66.09 | 53.03 | 68.14 | |
| 76 | FR | FRI22 | 26.77 | 52.47 | 60.26 | 55.85 | 70.39 | 56.97 | 72.53 | |
| 77 | FR | FRJ11 | 91.17 | 7.46 | 8.01 | 7.62 | 8.68 | 7.74 | 8.80 | |
| 78 | FR | FRJ12 | 95.01 | 4.22 | 4.57 | 4.31 | 4.91 | 4.43 | 4.97 | |
| 79 | FR | FRJ13 | 96.84 | 2.88 | 3.02 | 2.92 | 3.13 | 2.96 | 3.15 | |
| 80 | FR | FRJ14 | 27.17 | 40.12 | 49.97 | 43.04 | 66.77 | 45.56 | 71.30 | |
| 81 | FR | FRJ22 | 64.42 | 29.29 | 31.97 | 30.23 | 34.82 | 30.83 | 35.40 | |
| 82 | FR | FRJ27 | 85.04 | 13.64 | 14.27 | 13.86 | 14.85 | 13.99 | 14.94 | |
| 83 | FR | FRK11 | 18.27 | 55.09 | 64.52 | 59.75 | 78.00 | 60.55 | 80.74 | |
| 84 | FR | FRK12 | 14.99 | 43.80 | 54.95 | 47.44 | 75.67 | 49.81 | 82.44 | |
| 85 | FR | FRK13 | 12.84 | 45.65 | 57.90 | 49.37 | 79.65 | 52.72 | 85.24 | |
| 86 | FR | FRK14 | 13.67 | 43.61 | 54.29 | 47.75 | 76.09 | 49.53 | 83.28 | |
| 87 | FR | FRK21 | 31.44 | 41.39 | 48.10 | 43.74 | 61.02 | 45.92 | 65.68 | |
| 88 | FR | FRK22 | 56.10 | 29.11 | 33.87 | 30.50 | 41.46 | 31.90 | 43.28 | |
| 89 | FR | FRK23 | 64.53 | 26.66 | 29.70 | 27.50 | 34.16 | 28.49 | 35.12 | |
| 90 | FR | FRK24 | 31.21 | 36.58 | 42.73 | 38.17 | 55.60 | 40.44 | 62.04 | |
| 91 | FR | FRK25 | 24.21 | 48.11 | 56.43 | 51.24 | 70.54 | 53.11 | 74.29 | |
| 92 | FR | FRK26 | 41.76 | 43.44 | 49.13 | 45.66 | 56.37 | 47.17 | 57.75 | |
| 93 | FR | FRK27 | 9.03 | 19.74 | 24.87 | 21.27 | 42.88 | 23.49 | 59.01 | |
| 94 | FR | FRK28 | 7.20 | 26.59 | 32.42 | 29.27 | 56.07 | 32.25 | 70.05 | |
| 95 | FR | FRL01 | 62.12 | 23.22 | 26.90 | 24.23 | 33.96 | 25.38 | 36.49 | |
| 96 | FR | FRL02 | 21.67 | 27.41 | 34.11 | 29.32 | 53.86 | 31.34 | 66.00 | |
| 97 | FR | FRL03 | 73.63 | 16.62 | 19.68 | 17.45 | 24.48 | 18.46 | 25.82 | |
| 98 | FR | FRL04 | 99.75 | 0.23 | 0.24 | 0.23 | 0.25 | 0.24 | 0.25 | |
| 99 | FR | FRL05 | 98.79 | 1.12 | 1.17 | 1.13 | 1.20 | 1.15 | 1.21 | |
| 100 | FR | FRL06 | 94.31 | 5.09 | 5.38 | 5.16 | 5.64 | 5.27 | 5.68 | |
| 101 | IT | ITC11 | 56.39 | 13.78 | 16.18 | 14.87 | 27.93 | 16.19 | 35.31 | |
| 102 | IT | ITC12 | 63.46 | 12.58 | 13.85 | 13.66 | 24.03 | 14.63 | 29.48 | |
| 103 | IT | ITC13 | 54.73 | 23.44 | 24.87 | 25.05 | 37.81 | 26.66 | 42.42 | |
| 104 | IT | ITC14 | 6.61 | 19.04 | 21.71 | 21.19 | 46.63 | 21.94 | 61.41 | |
| 105 | IT | ITC15 | 75.03 | 21.29 | 22.10 | 21.86 | 24.56 | 22.21 | 24.87 | |
| 106 | IT | ITC16 | 74.04 | 13.54 | 16.35 | 14.43 | 22.34 | 15.26 | 24.62 | |
| 107 | IT | ITC17 | 99.50 | 0.47 | 0.48 | 0.47 | 0.50 | 0.48 | 0.50 | |
| 108 | IT | ITC18 | 93.46 | 5.41 | 5.90 | 5.56 | 6.42 | 5.72 | 6.51 | |
| 109 | IT | ITC20 | 6.84 | 12.74 | 14.74 | 14.14 | 32.66 | 15.99 | 49.56 | |
| 110 | IT | ITC31 | 95.41 | 4.09 | 4.33 | 4.15 | 4.54 | 4.25 | 4.58 | |
| 111 | IT | ITC32 | 98.34 | 1.55 | 1.61 | 1.57 | 1.65 | 1.59 | 1.66 | |
| 112 | IT | ITC33 | 61.33 | 28.54 | 33.23 | 29.80 | 37.63 | 31.13 | 38.46 | |
| 113 | IT | ITC34 | 70.02 | 24.60 | 27.42 | 25.12 | 29.49 | 26.20 | 29.89 | |
| 114 | IT | ITC41 | 37.33 | 44.22 | 47.04 | 46.10 | 59.75 | 46.03 | 61.86 | |
| 115 | IT | ITC42 | 17.72 | 35.51 | 38.89 | 37.43 | 59.56 | 36.66 | 68.13 | |
| 116 | IT | ITC43 | 21.64 | 31.79 | 35.35 | 33.56 | 54.10 | 33.24 | 64.23 | |
| 117 | IT | ITC44 | 2.44 | 8.40 | 10.28 | 9.22 | 19.95 | 9.41 | 29.17 | |
| 118 | IT | ITC46 | 35.16 | 23.35 | 26.95 | 24.98 | 39.20 | 25.34 | 47.72 | |
| 119 | IT | ITC48 | 92.23 | 6.56 | 7.09 | 6.72 | 7.65 | 6.89 | 7.75 | |
| 120 | IT | ITC49 | 96.09 | 3.66 | 3.78 | 3.71 | 3.88 | 3.74 | 3.91 | |
| 121 | IT | ITC4A | 95.97 | 3.78 | 3.90 | 3.83 | 4.01 | 3.86 | 4.03 | |
| 122 | IT | ITC4C | 89.01 | 10.15 | 10.47 | 10.27 | 10.90 | 10.37 | 10.97 | |
| 123 | IT | ITC4D | 71.96 | 25.49 | 26.40 | 25.86 | 27.78 | 26.01 | 27.98 | |
| 124 | IT | ITH51 | 73.95 | 20.20 | 22.83 | 20.94 | 25.42 | 21.70 | 25.93 | |
| 125 | IT | ITH52 | 64.22 | 28.23 | 31.89 | 29.03 | 35.01 | 30.28 | 35.63 | |
| 126 | LI | LI000 | 0.86 | 6.29 | 8.06 | 8.38 | 27.94 | 8.46 | 37.96 | |
| 127 | LU | LU000 | 3.59 | 22.41 | 33.18 | 27.91 | 66.49 | 30.77 | 83.87 | |
| 128 | MC | MC | 99.89 | 0.11 | 0.11 | 0.11 | 0.11 | 0.11 | 0.11 | |
| 129 | NL | NL11 | 0.88 | 4.77 | 8.05 | 5.02 | 18.50 | 7.52 | 39.66 | |
| 130 | NL | NL12 | 1.38 | 6.88 | 11.17 | 7.20 | 23.64 | 10.62 | 44.98 | |
| 131 | NL | NL13 | 0.53 | 3.09 | 5.19 | 3.26 | 13.13 | 4.90 | 31.67 | |
| 132 | NL | NL21 | 0.75 | 4.50 | 7.39 | 4.94 | 19.45 | 7.09 | 43.11 | |
| 133 | NL | NL22 | 1.01 | 6.17 | 9.95 | 6.97 | 25.88 | 9.57 | 51.56 | |
| 134 | NL | NL23 | 1.84 | 9.52 | 15.06 | 10.21 | 32.19 | 14.47 | 56.49 | |
| 135 | NL | NL31 | 1.07 | 6.36 | 10.21 | 6.96 | 25.43 | 9.88 | 49.98 | |
| 136 | NL | NL32 | 2.10 | 10.53 | 16.56 | 11.09 | 34.47 | 15.92 | 58.52 | |
| 137 | NL | NL33 | 2.22 | 11.72 | 17.90 | 12.60 | 37.83 | 17.05 | 62.03 | |
| 138 | NL | NL34 | 8.27 | 31.48 | 42.21 | 33.67 | 66.30 | 40.26 | 80.68 | |
| 139 | NL | NL41 | 1.56 | 9.71 | 15.29 | 11.01 | 37.38 | 14.53 | 64.05 | |
| 140 | NL | NL42 | 2.19 | 13.71 | 21.22 | 16.29 | 49.84 | 20.33 | 74.92 | |

*AT: Austria; BE: Belgium; CH: Switzerland; DE: Germany; FR: France; IT: Italy; LI: Liechtenstein; LU: Luxembourg; MC: Monaco; NL: the Netherlands). NUTS: Nomenclature of Territorial Units for Statistics (https://ec.europa.eu/eurostat/web/nuts).

Table S2. Percentage of traps with sand flies (positive traps) according to climatic variables

| Variable | Level | No. Traps | % +ve. traps | 95% CL | p value |
| --- | --- | --- | --- | --- | --- |
| Precipitation (mm) | 170-215 | 356 | 13 | 13-13 | 0.3398 |
|  | 216-260 | 107 | 16 | 15-17 |  |
|  | 262-306 | 24 | 4 | 3-6 |  |
| Solar radiation (W/m²) | 14467-15809 | 116 | 3 | 2-3 | <0.0001 |
|  | 15817-17151 | 213 | 12 | 13-13 |  |
|  | 17177-18514 | 158 | 23 | 22-23 |  |
| Average of the mean temperature (0C) | 15.4-16.6 | 128 | 5 | 4-5 | <0.0001 |
|  | 16.6-17.7 | 295 | 13 | 12-13 |  |
|  | 17.7-18.9 | 64 | 34 | 33-36 |  |
| Average of the maximum temperature (0C) | 20.2-21.7 | 155 | 5 | 4-5 | <0.0001 |
|  | 21.7-23.2 | 245 | 12 | 12-13 |  |
|  | 23.2-24.7 | 87 | 32 | 31-33 |  |
| Average of the minimum temperature (0C) | 10.2-11.3 | 86 | 5 | 4-5 | <0.0001 |
|  | 11.3-12.4 | 341 | 11 | 11-12 |  |
|  | 12.4-13.5 | 60 | 37 | 35-38 |  |
| Average vapour (water) pressure | 1.31-1.38 | 170 | 5 | 5-5 | <0.0001 |
|  | 1.38-1.45 | 196 | 13 | 12-13 |  |
|  | 1.45-1.52 | 121 | 26 | 26-27 |  |
| Mean Wind speed (m/s) | 2.0-2.4 | 76 | 21 | 20-22 | 0.0030 |
|  | 2.4-2.8 | 262 | 15 | 15-16 |  |
|  | 2.8-3.2 | 149 | 6 | 6-6 |  |

*95% confidence limits

Table S3. Percentage of traps with sand flies (positive traps) according to CORINE Land Cover (CLC) variables and codes.

| Variable | Level (%) | Total | Prevalence % | 95% CI | p value |
| --- | --- | --- | --- | --- | --- |
| Continuous urban, indust, road, rail | 0 | 442 | 14 | 14-14 | 0.1639 |
| 111, 121, 122 | 1-27 | 35 | 6 | 4-7 |  |
|  | 29-54 | 10 | 0 | 0 |  |
| Discontinuous urban | 0 | 140 | 14 | 13-14 | 0.0352 |
| 112 | 3-45 | 274 | 16 | 15-16 |  |
|  | 46-88 | 73 | 4 | 4-5 |  |
| Mineral extraction and contruction sites | 0 | 475 | 13 | 13-13 | 0.2232 |
| 131, 132 | 5-15 | 6 | 33 | 18-49 |  |
|  | 18-42 | 6 | 0 | 0 |  |
| Pastures, green urban areas, sport and leisure facilities | 0 | 170 | 15 | 14-15 | 0.0097 |
| 141, 142, 231 | 1-33 | 176 | 7 | 7-8 |  |
|  | 34-66 | 105 | 21 | 20-22 |  |
|  | 67-100 | 36 | 14 | 12-16 |  |
| Agriculture: arable, fruit, vine, | 0 | 94 | 6 | 6-7 | 0.1767 |
| 211, 221, 222, 242 | 1-33 | 219 | 15 | 15-15 |  |
|  | 34-66 | 131 | 15 | 15-16 |  |
|  | 67-100 | 43 | 14 | 12-16 |  |
| Bush2 | 0 | 356 | 13 | 13-13 | 0.2659 |
| 243, 322, 324 | 1-26 | 91 | 18 | 17-18 |  |
|  | 27-54 | 40 | 8 | 6-9 |  |
| Forest | 0 | 192 | 16 | 15-16 | 0.5580 |
| 311, 312, 313 | 1-33 | 223 | 13 | 13-13 |  |
|  | 34-66 | 59 | 8 | 8-9 |  |
|  | 67-100 | 13 | 8 | 4-12 |  |
| Water | 0 | 403 | 14 | 14-14 | 0.9643 |
| 511, 512 | 1-15 | 33 | 12 | 10-14 |  |
|  | 16-31 | 51 | 12 | 11-13 |  |

*95% confidence limits
